Supplementary Figure 2: Genome copy number per  $\mu\text{l}$  viral transport media (y-axis) as determined by RT-qPCR for samples from 2004-2005 (left) and 2005-2006 (right) seasons by treatment group. IIV, inactivated influenza vaccine; LAIV, live attenuated influenza vaccine.

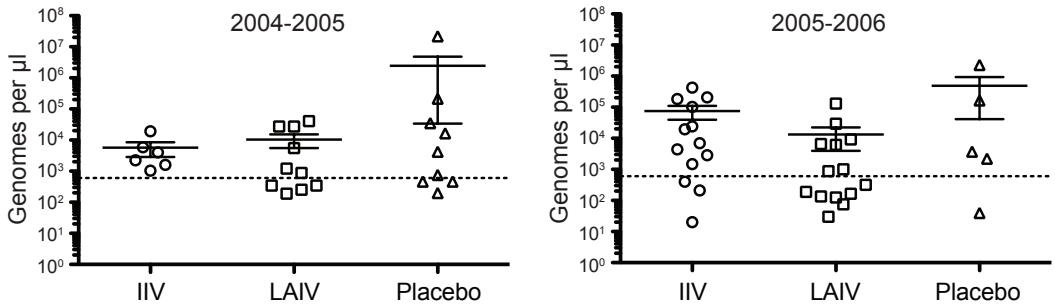

Source: https://www.biorxiv.org/content/biorxiv/suppl/2016/11/07/085985.DC1/085985-2.pdf
